# Supplementary material
Source: PubMed Central journal article supplement (PMC3744029)
Supplement: supp_126.16.3746_JCS128975.pdf [file supp_126.16.3746_JCS128975.pdf]

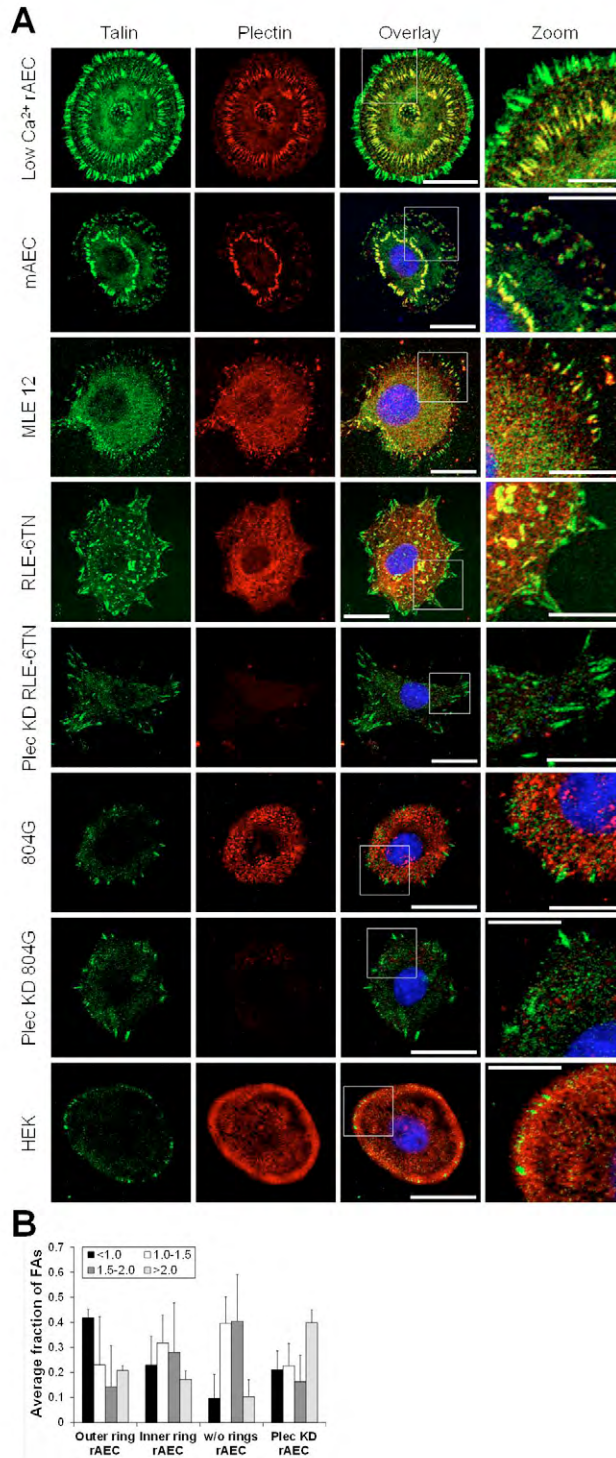

**Fig. S1. FA organization in AEC and additional cell types.** (A) Immunostaining for talin and plectin was performed on the cells types indicated on the left of the images and conditions as marked. The overlays of the two images on the left are shown in the third column and include nuclear DAPI staining shown in blue if present. The boxed areas in the overlays are shown at higher magnifications in the right column (zoom). Scale bars: 20  $\mu$ m in the overlay; 10  $\mu$ m in zoom. (B) The graph presents the average number of FAs within the designated size range out of the total number of FAs measured for each cell type;  $n \geq 25$  FAs in 3-6 cells per condition  $\pm$  s.d.

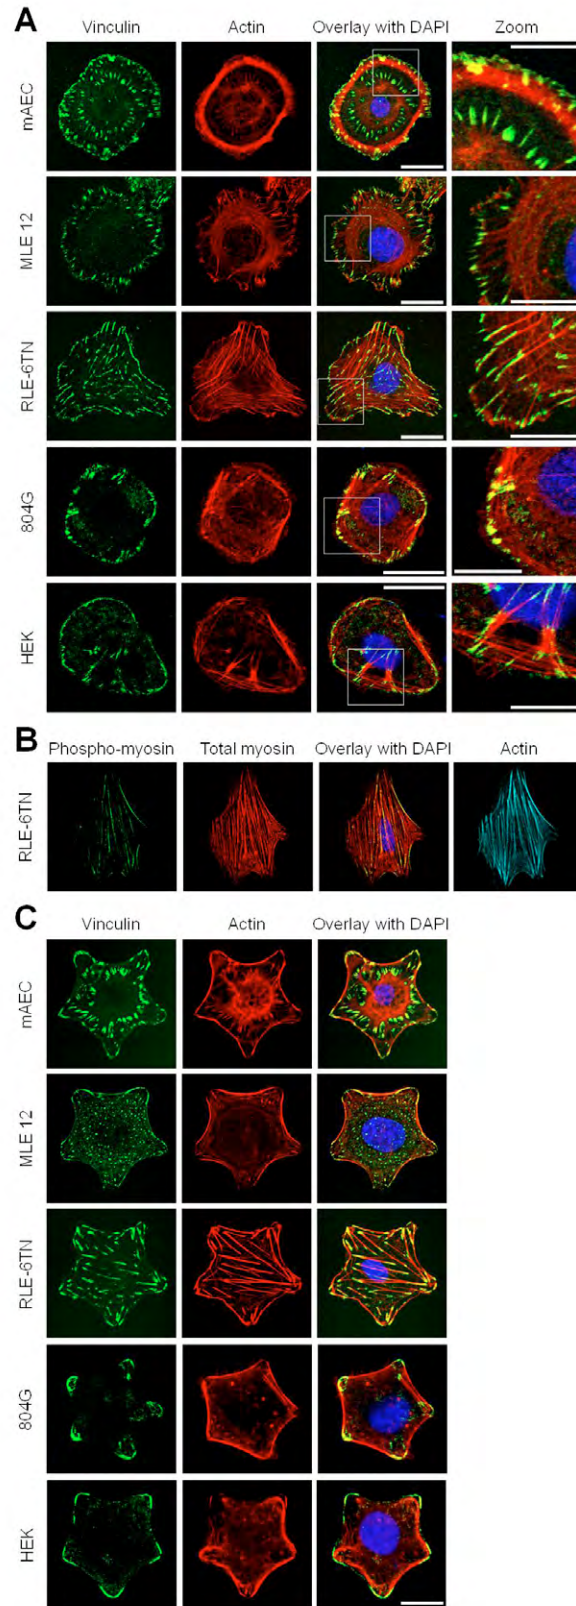

**Fig. S2. Actin organization in AEC and other epithelial cell types.** (A) FAs of the indicated cells were stained using an antibody against vinculin together with Rhodamine-conjugated phalloidin as a marker for actin. Overlays of the two images on the left are shown in the third column and include DAPI staining of nuclei. The boxed areas in the overlays are shown at higher magnifications (zoom) in the column at the right. Scale bars: 20  $\mu\text{m}$  in overlay; 10  $\mu\text{m}$  in zoom. (B) RLE-6TN plated on glass coverslips were immunostained for phospho- and total-myosin and also processed with Alexa647-conjugated phalloidin to mark the actin cytoskeleton. Overlays of the two images on the left are shown in the third column and include DAPI staining of nuclei. The images in the right column show the total actin cytoskeletal network. Scale bar: 20  $\mu\text{m}$ . (C) The indicated cells were seeded onto star micro-patterns and stained for vinculin and actin. Overlays of the two images on the left are shown in the third column and include DAPI nuclear staining. Scale bar: 20  $\mu\text{m}$ .

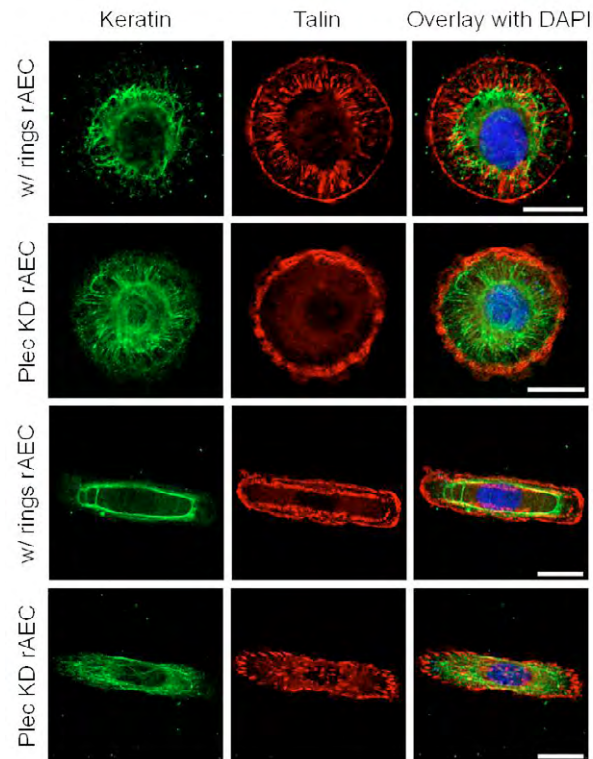

**Fig. S3. Keratin bundles are restricted by cFA rings when cells are plated onto micro-patterned substrates.** rAEC and Plec KD rAEC maintained on circle or rectangle micro-patterned substrates were immunostained for keratin and talin. The overlay of the two images to the left is shown in the right column and includes DAPI staining of nuclei. Scale bar: 20  $\mu\text{m}$ .

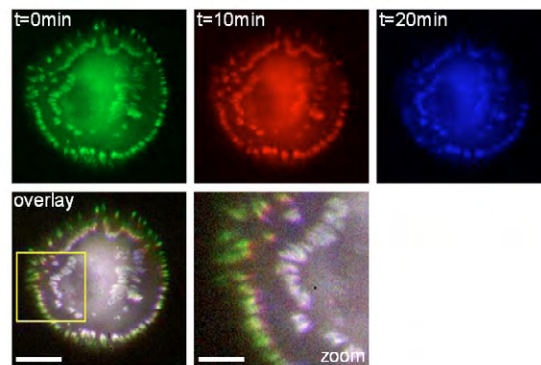

**Fig. S4. pFAs and cFAs in rAEC display minimal dynamics.** Live images of rAEC infected with GFP-paxillin were captured over time. Three of the resulting images ( $t=0$ , 10, and 20 min) were labeled in green, red, and blue colors respectively, and the three images were overlaid to display FA dynamics. The white color in the overlay and zoom images (scale bars: 20  $\mu\text{m}$  and 10  $\mu\text{m}$  respectively) indicates lack of movement.
